# Supplementary material
Source: publisher figshare collection journal article supplement (https://karger.figshare.com/ndownloader/files/27759180)

**Supplementary Material.**

**Supplementary Fig 1.** Asiansubgroup analysis patient disposition.


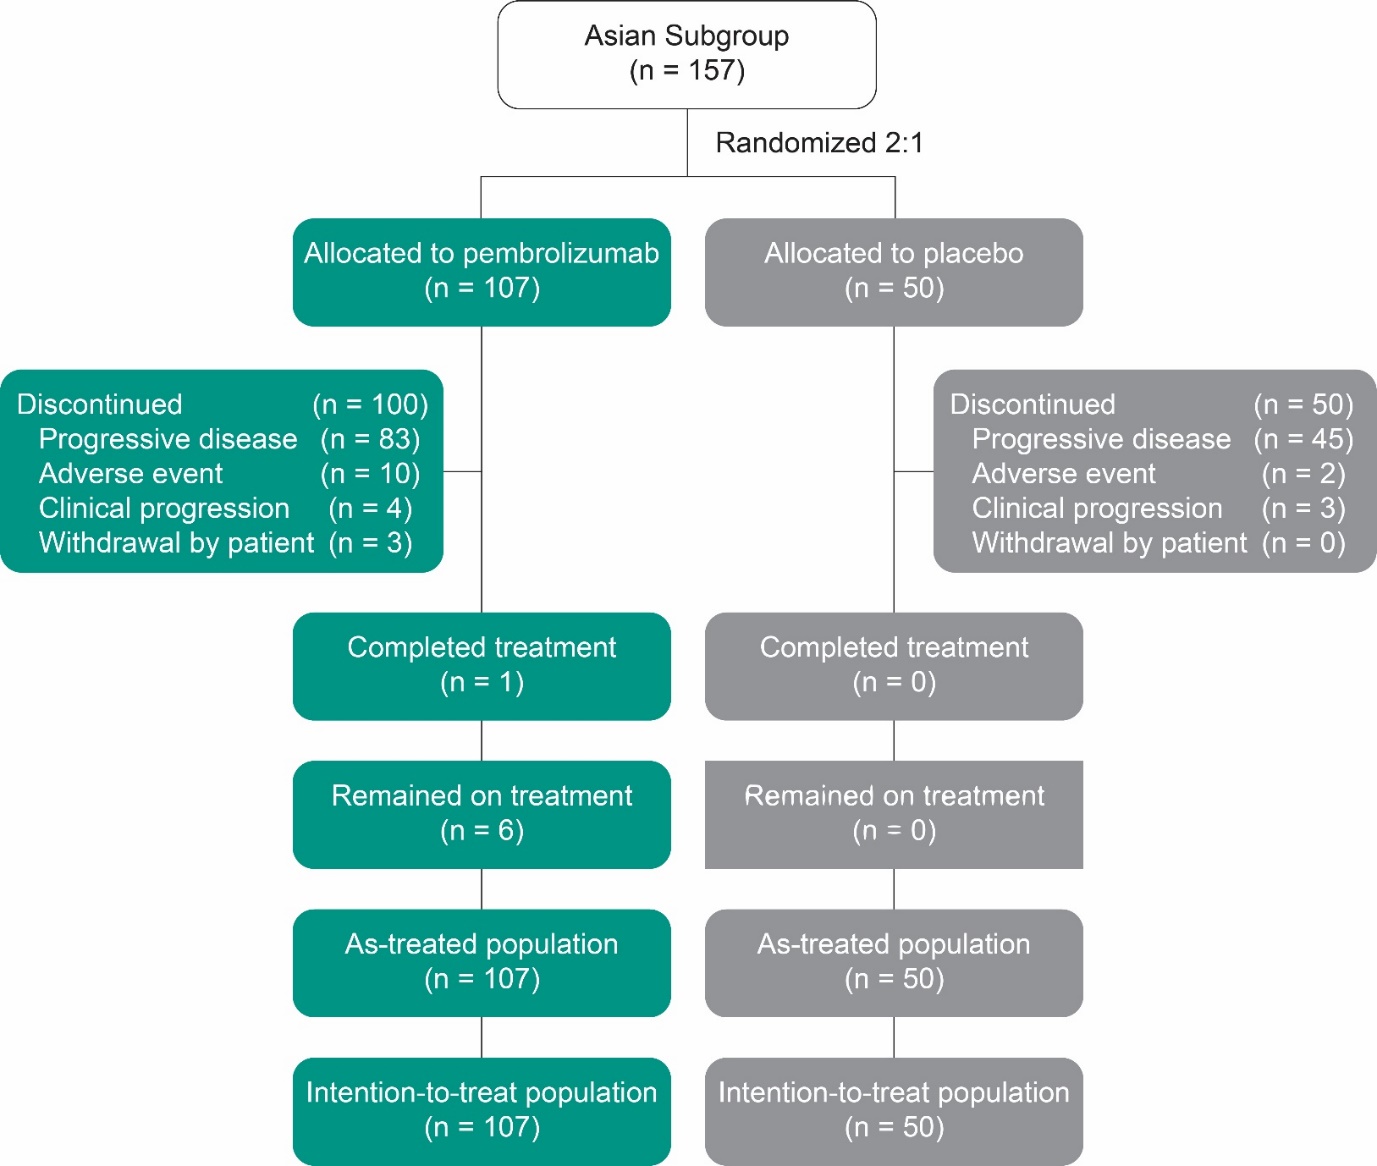


**Supplementary Fig 2.** Percentage of patients on post-study anticancer therapy among those alive by month.


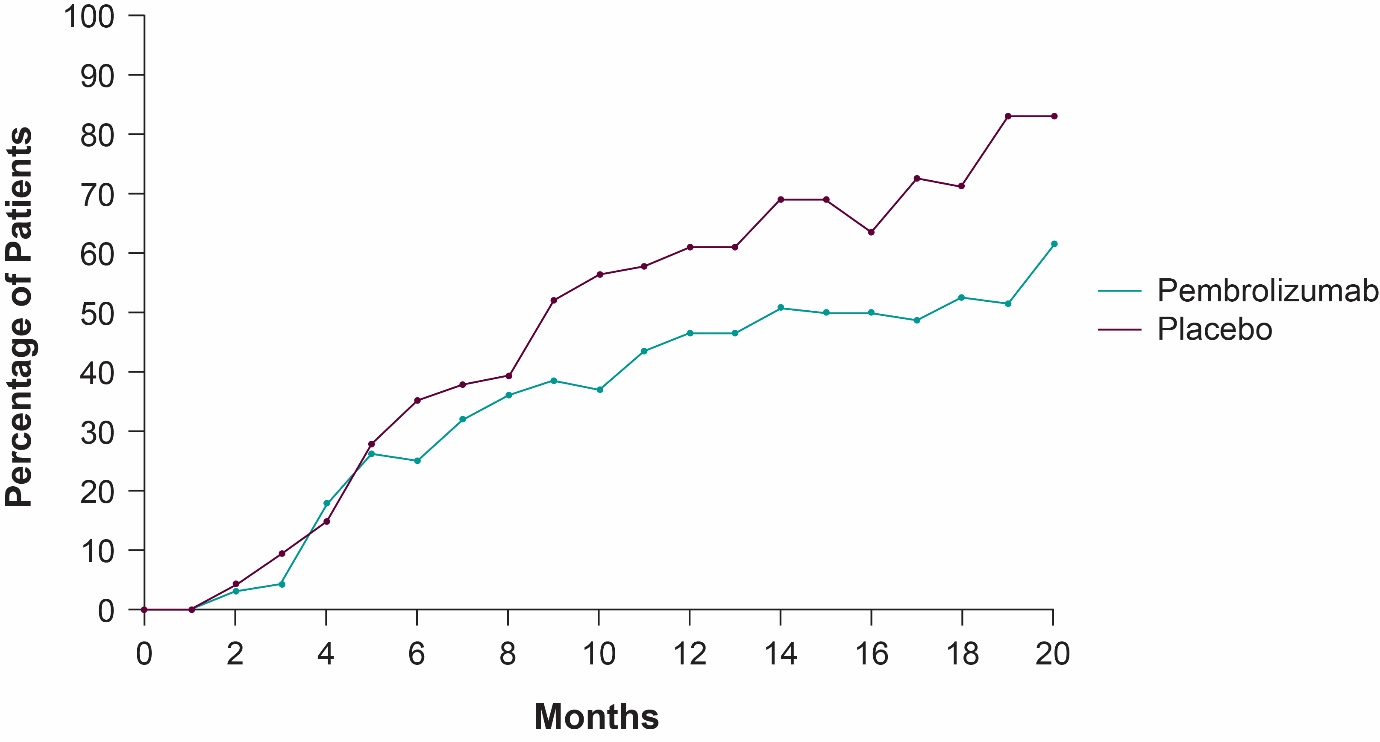

Supplement: Supplementary file 1 [file 27759180]
